# Supplementary material
Source: PubMed Central journal article supplement (PMC1069129)
Supplement: nar_33_5_1710__2.pdf [file nar_33_5_1710__2.pdf]

**Figure 2S**

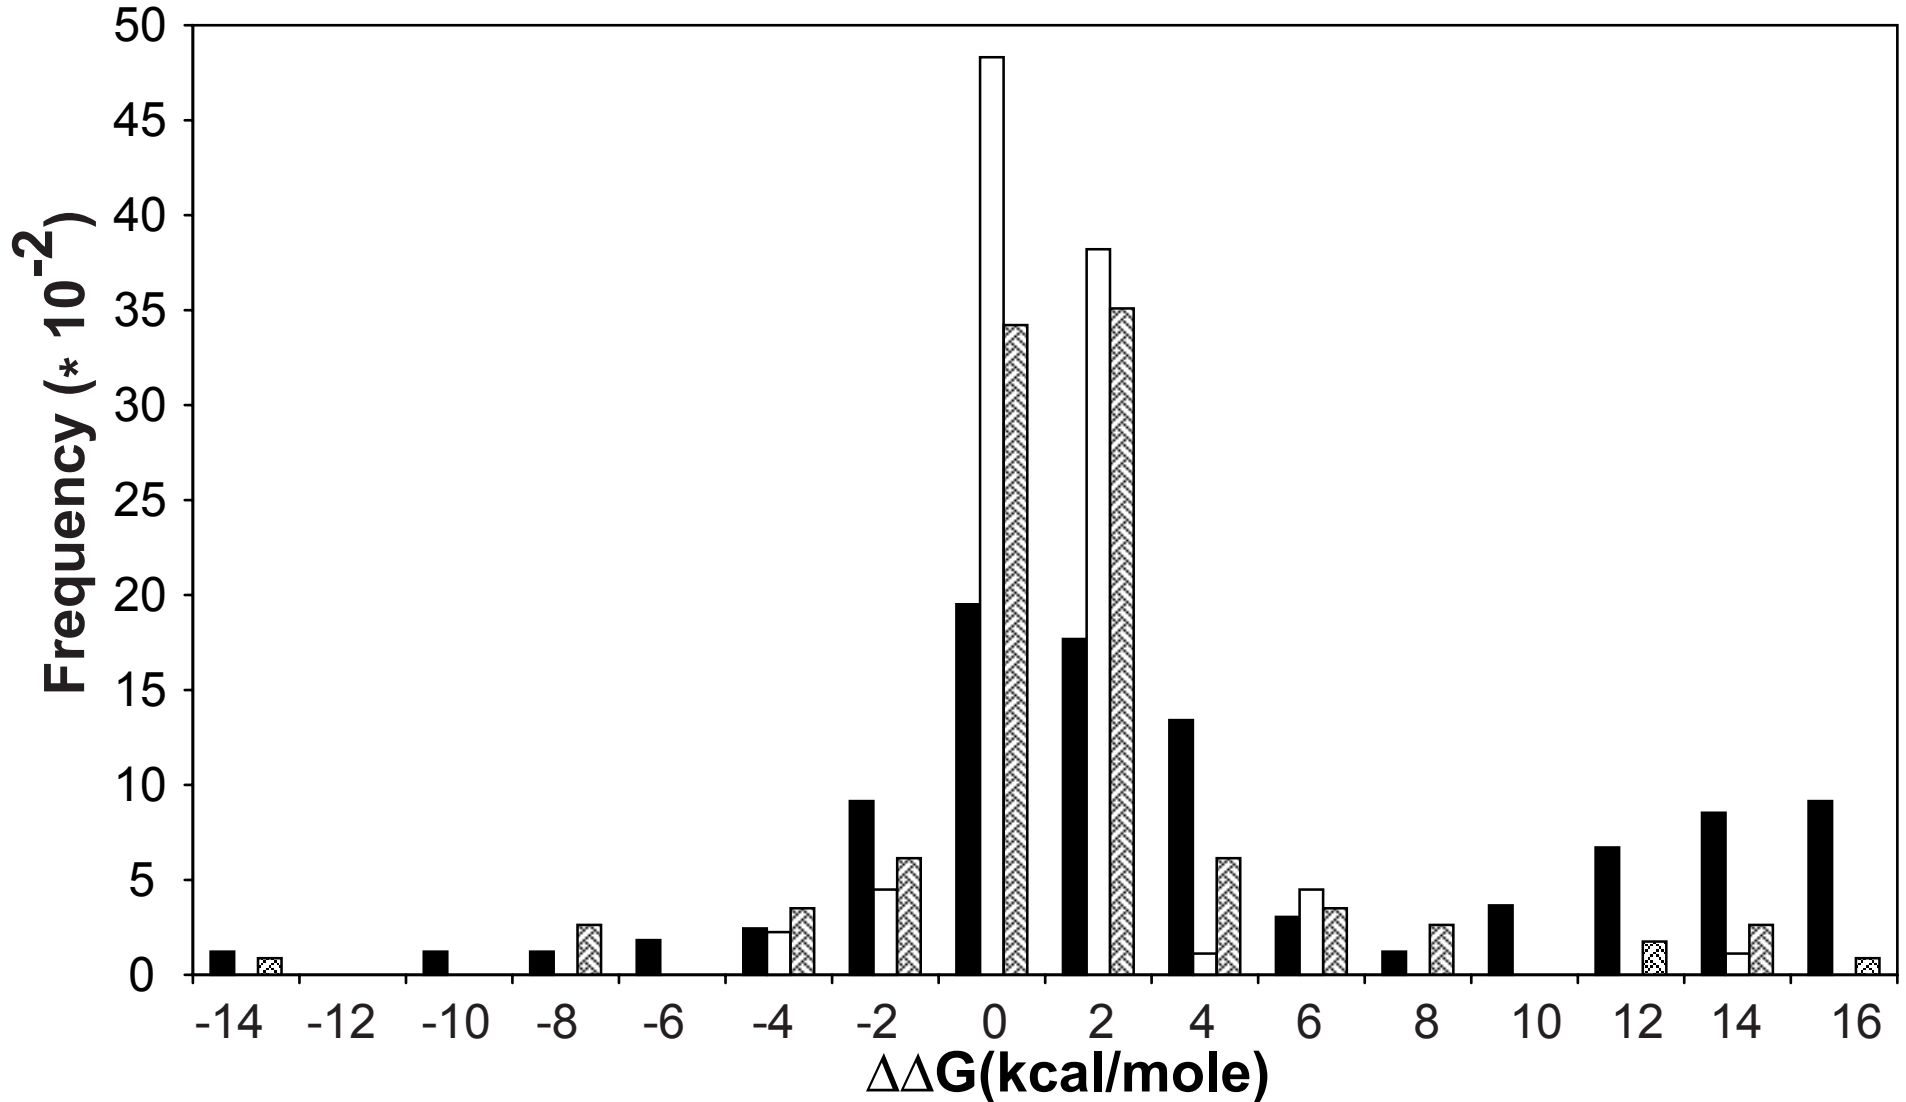

Frequency distribution of  $\Delta\Delta G$  values (change in free energy of hydrophathy) for the disease-causing (black bars), neutral (white bars) and dbSNP (shaded bars) variation datasets.
